# Supplementary material for: Noble Metal Promoted TiO2 from Silver-Waste Valorisation: Synergism between Ag and Au
Source: MDPI journal article supplement (doi:10.3390/catal12020235), 2022-02-19
Supplement: s1 [file s1]

# Noble Metal Promoted TiO<sub>2</sub> from Silver-Waste Valorisation: Synergism between Ag and Au

Marta Stucchi <sup>1,\*</sup>, Daniela Meroni <sup>1</sup>, György Safran <sup>2</sup>, Alberto Villa <sup>1</sup>, Claudia L. Bianchi <sup>1</sup> and Laura Prati <sup>1</sup>

<sup>1</sup> Chemistry Department, University of Milan, Via Golgi 19, Milan 20133, Italy; daniela.meroni@unimi.it (D.M.); alberto.villa@unimi.it (A.V.); claudia.bianchi@unimi.it (C.L.B.); laura.prati@unimi.it (L.P.)

<sup>2</sup> Centre for Energy Research, Institute of Technical Physics and Materials Science, Thin Film Physics Department, P.O. Box 49, H-1525 Budapest, Hungary; gyorgy.safran@ek-cer.hu

\* Correspondence: marta.stucchi@unimi.it; Tel.: +39-02503-14365

## Supplementary Materials

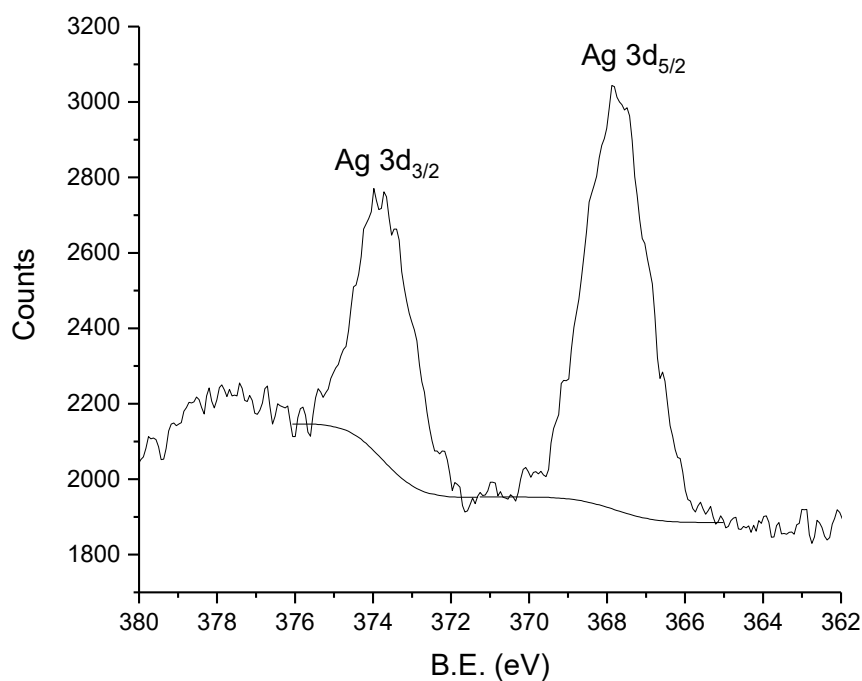

Figure S1. Ag 3d XPS high resolution spectra of 3%Ag-TiO<sub>2</sub>

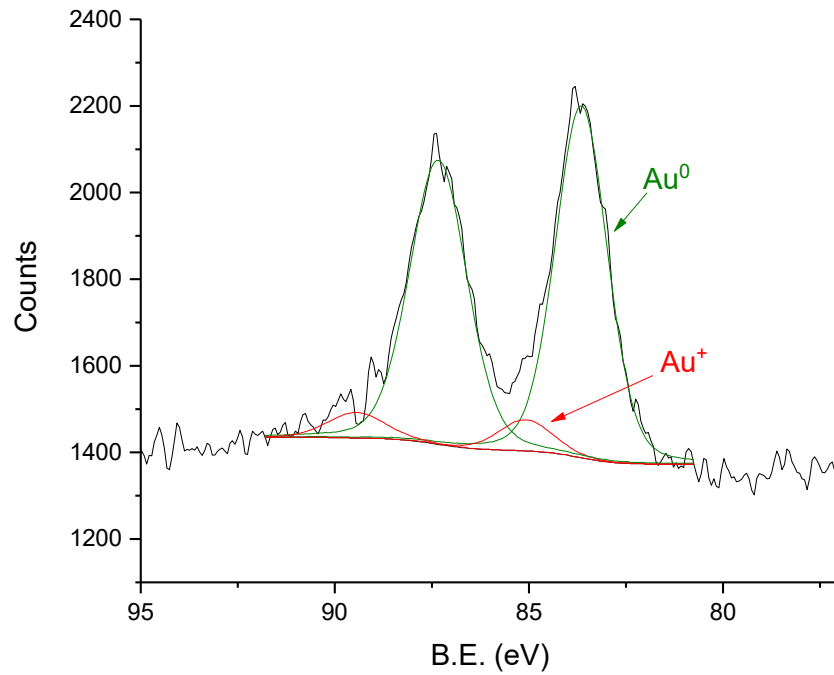

**Figure S2.** Au 4f XPS high resolution spectrum of 0.5%Au-TiO<sub>2</sub>.

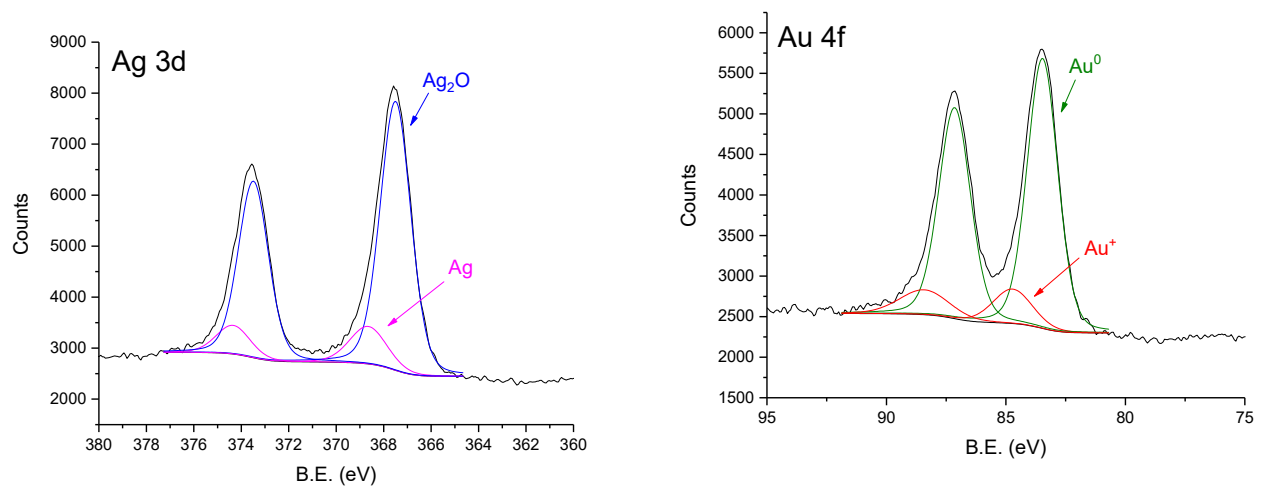

**Figure S3.** Ag 3d and Au 4f XPS high resolution spectra of 0.5%Au/3%Ag-TiO<sub>2</sub>.

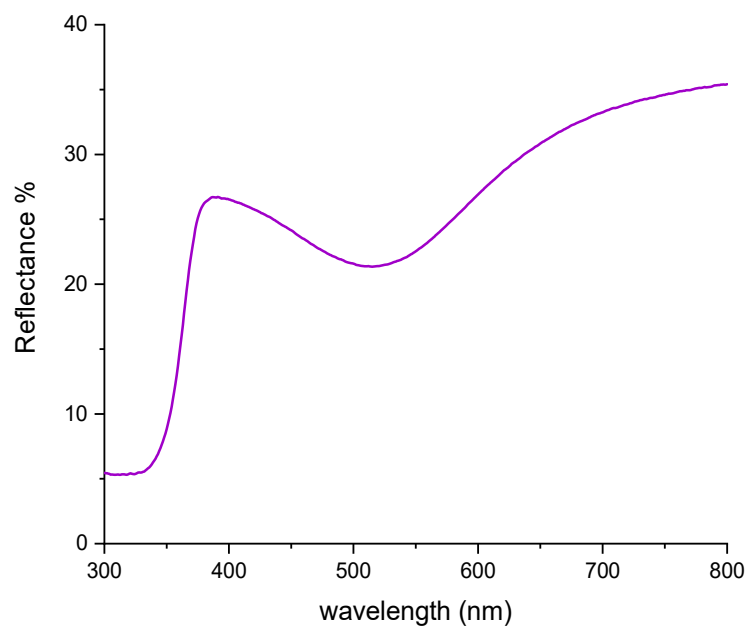

**Figure S4.** Reflectance spectrum of 2%Au/3%Ag-TiO<sub>2</sub>.

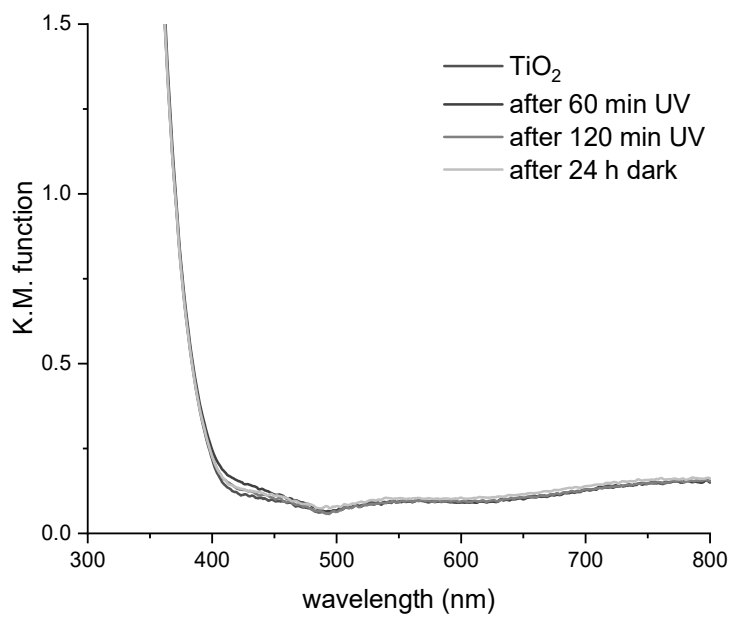

**Figure S5.** Absorbance spectra of pristine TiO<sub>2</sub> as obtained, after irradiation with UV light for 60 and 120 min, and after 24 h storage in the dark.

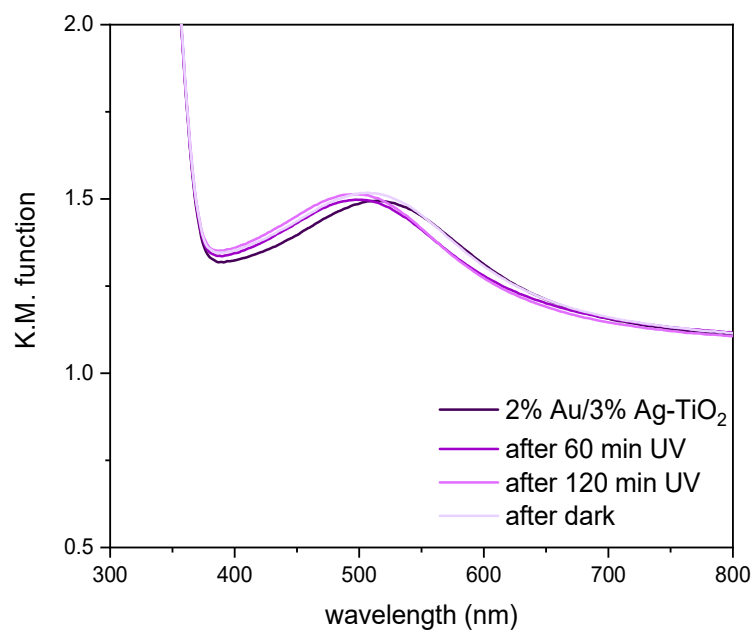

**Figure S6.** Absorbance spectra of 2%Au/3%Ag-TiO<sub>2</sub> as obtained, after irradiation with UV light for 60 and 120 min, and after 24 h storage in the dark.
